# Supplementary material
Source: PubMed Central journal article supplement (PMC4247576)
Supplement: supp_tpc.114.129759_tpc129759_Supplemental.pdf [file supp_tpc.114.129759_tpc129759_Supplemental.pdf]

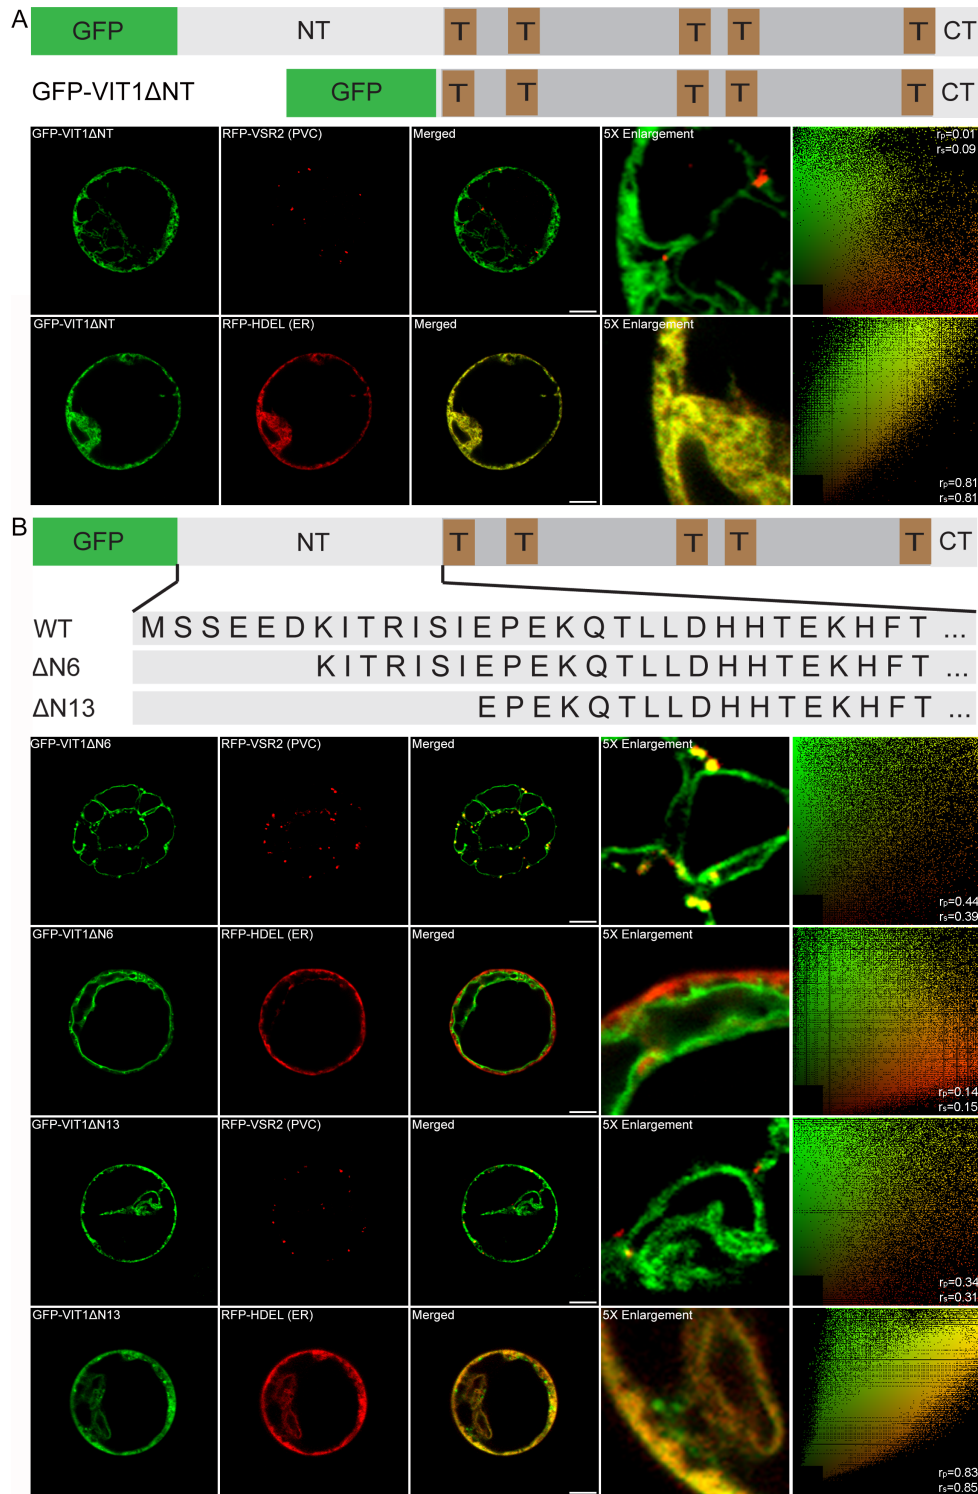

Supplemental Figure 1. The N terminal of VIT1 is essential for its trafficking.  
(A) The N terminal of VIT1 was deleted and this truncation form was trapped in the ER in *Arabidopsis* protoplasts.

(B) Further truncation constructs of N terminal were generated and transiently expressed in *Arabidopsis* protoplasts. Bar=10  $\mu$ m.

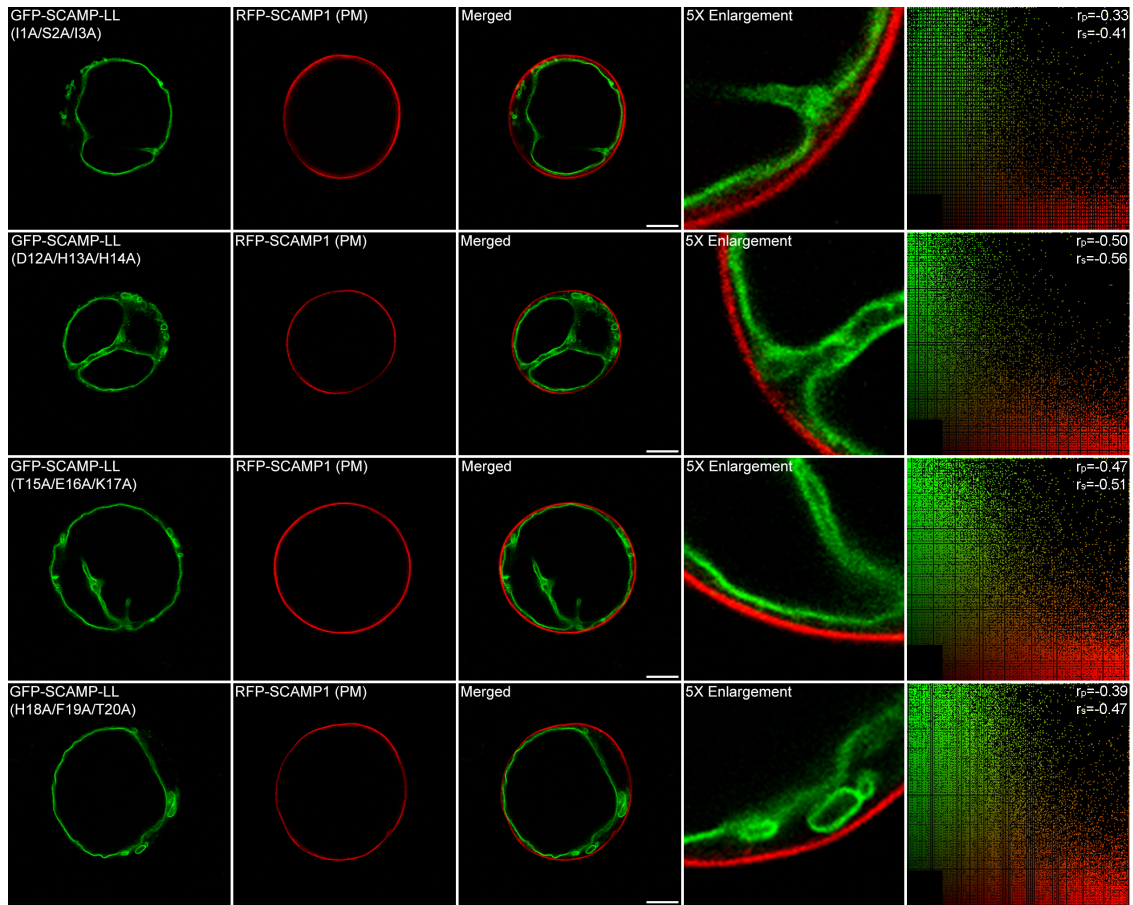

Supplemental Figure 2. Subcellular localization of GFP-SCAMP1 fused with the mutated N terminal of VIT1. Fusion constructs were transiently co-expressed with RFP-SCAMP1 in *Arabidopsis* protoplasts. Bar=10  $\mu$ m.

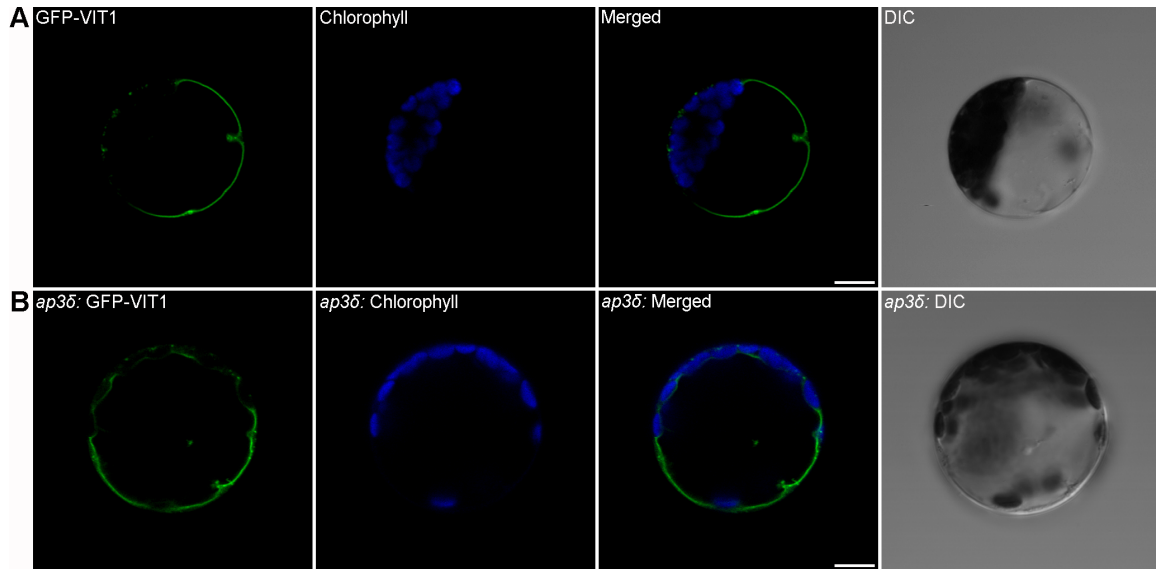

Supplemental Figure 3. Localization of VIT1 was not affected in the *ap3δ* mutant. GFP-VIT1 was transfected into mesophyll protoplasts isolated from leaves of WT (A) and *ap3δ* mutants (B). Bar=10  $\mu$ m.

Supplemental Table 1. Primers Used in This Study.

|                                   |                                                                                                                |
|-----------------------------------|----------------------------------------------------------------------------------------------------------------|
| GFP-VIT1-Forward                  | 5'- gggTCTAGAATGTCGTCGGAGGAAGATAAG -3'                                                                         |
| GFP-VIT1-Reverse                  | 5'- gggGAGCTCCTAATGTTGCACAACCTTAGCC -3'                                                                        |
| GFP-VIT1 $\Delta$ NT-Forward      | 5'- gggTCTAGAATGATCATCATCGGCGTCTCTGATGGTT<br>TA -3'                                                            |
| GFP-VIT1 $\Delta$ N6-Forward      | 5'- gggTCTAGAATGATTACAAGAATCTCTATCGAACCG -3'                                                                   |
| GFP-VIT1 $\Delta$ N13-<br>Forward | 5'- gggTCTAGAATGGAACCGGAGAAGCAAACACTTCTCG<br>-3'                                                               |
| GFP-<br>VIT1(I8A/I11A/I13A)       | 5'- gggTCTAGAATGTCGTCGGAGGAAGATAAAGGCTACAA<br>GAGCCTCTGCCGAACCGGA -3'                                          |
| GFP-VIT1(I8A)                     | 5'- gggTCTAGAATGTCGTCGGAGGAAGATAAAGGCTACAA<br>GAATCTCTATCGAACCGGA -3'                                          |
| GFP-VIT1(I11A/I13A)               | 5'- gggTCTAGAATGTCGTCGGAGGAAGATAAAGATTACAA<br>GAGCCTCTGCCGAACCGGA -3'                                          |
| GFP-<br>VIT1(E16A/L20A/L21A)      | 5'- gggTCTAGAATGTCGTCGGAGGAAGATAAAGATTACAAG<br>AATCTCTATCGAACCGGCGAAGCAAACAGCTGCCGATCA<br>TCACACC -3'          |
| GFP-VIT1(E16A)                    | 5'- gggTCTAGAATGTCGTCGGAGGAAGATAAAGATTACAAG<br>AATCTCTATCGAACCGGCGAAGCAAACACTTCTCGATCA<br>TCACACC -3'          |
| GFP-VIT1(L20A/L21A)               | 5'- gggTCTAGAATGTCGTCGGAGGAAGATAAAGATTACAAG<br>AATCTCTATCGAACCGGAGAAGCAAACAGCTGCCGATCA<br>TCACACC -3'          |
| GFP-SCAMP1-LL                     | 5'- gggCTCGAGTTAGGTGAAGTGTTTCTCGGTGTGATGA<br>TCGAGAAGTGTTTGCTTCTCCGGTTCGATAGAGATAAAA<br>GCTGCCCGCATAGC -3'     |
| GFP-SCAMP1-<br>LL(E6A/L10A/L11A)  | 5'- gggCTCGAGTTAGGTGAAGTGTTTCTCGGTGTGATGAT<br>CAGCTGCTGTTTGCTTAGCCGGTTCGATAGAGATAAAAG<br>CTGCCCGCATAGC -3'     |
| GFP-SCAMP1-<br>LL(K7A/Q8A/T9A)    | 5'- gggCTCGAGTTAGGTGAAGTGTTTCTCGGTGTGATGA<br>TCGAGAAGTGCAGCTGCCTCCGGTTCGATAGAGATAAAA<br>GCTGCCCGCATAGC -3'     |
| GFP-SCAMP1-<br>LL(I1A/S2A/I3A)    | 5'- gggCTCGAGTTAGGTGAAGTGTTTCTCGGTGTGATGA<br>TCGAGAAGTGTTTGCTTCTCCGGTTCGAGCTGCAAAA<br>GCTGCCCGCATAGCACCCCT -3' |
| GFP-SCAMP1-<br>LL(D12A/H13A/H14A) | 5'- gggCTCGAGTTAGGTGAAGTGTTTCTCGGTTCGAGCT<br>GCGAGAAGTGTTTGCTTCTCCGGTTCGATAGAGATAAAA<br>GCTGCCCGCATAGC -3'     |
| GFP-SCAMP1-<br>LL(T15A/E16A/K17A) | 5'- gggCTCGAGTTAGGTGAAGTGTCAGCTGCGTGATGA<br>TCGAGAAGTGTTTGCTTCTCCGGTTCGATAGAGATAAAA<br>GCTGCCCGCATAGC-3'       |
| GFP-SCAMP1-<br>LL(H18A/F19A/T20A) | 5'- gggCTCGAGTTATGCAGCTGCTTTCTCGGTGTGATGAT<br>CGAGAAGTGTTTGCTTCTCCGGTTCGATAGAGATAAAAG<br>CTGCCCGCATAGC-3'      |
| AP1y1-YFP-Forward                 | 5'- gggTCTAGAATGAATCCATTCTTCCGGCACGCG -3'                                                                      |



|                                                    |                                                       |
|----------------------------------------------------|-------------------------------------------------------|
| AP1 $\gamma$ 1-YFP-Reverse                         | 5'- gggGGTACCTAACCCACGTGGGAAATTGTTGATTTG -3'          |
| AP1 $\gamma$ 2-YFP-Forward/<br>AP1 $\gamma$ 2-RT-F | 5'- gggTCTAGAATGAATCCCTTTTCTTCTGGTACTCG -3'           |
| AP1 $\gamma$ 2-YFP-Reverse<br>AP1 $\gamma$ 2-RT-R  | 5'- gggGGTACCCAACCCGCGAGGGGAAGTTGCTGACTTG -<br>3'     |
| AP3 $\delta$ -YFP-Forward                          | 5'- gggGGTACCATGTCTGTCGTCTTCCACTTCTATAATGG<br>AC -3'  |
| AP3 $\delta$ -YFP-Reverse                          | 5'- gggACTAGTCAAGAGAAAATCTGGAATTATAACTTGT<br>TC -3'   |
| AP1 $\sigma$ 1-4HA-Forward                         | 5'- gggGGATCCATGATACATTTTCGTGTTACTAGTCAGTCG<br>-3'    |
| AP1 $\sigma$ 1-4HA-Reverse                         | 5'- gggCTCGAGGAATTCCTTGGTAGCCTGAGCAATTATAT<br>TAC -3' |
| AP1 $\sigma$ 2-4HA -Forward                        | 5'- gggGGATCCACTAGTATGATACATTTTGTGCTTCTAG -<br>3'     |
| AP1 $\sigma$ 2-4HA -Reverse                        | 5'- gggCTCGAGGAATTCTCGATTAGTAGCCTGAGCG -3'            |
| AP3 $\sigma$ -4HA -Forward                         | 5'- gggGGATCCATGATTAAGGCAGTGATGATGATG -3'             |
| AP3 $\sigma$ -4HA -Reverse                         | 5'- gggCTCGAGGAATTCACGGCCACGCCACCCGGAAC -<br>3'       |
| RNAi-AP1 $\gamma$ 1-F XhoI                         | 5'- gggCTCGAGTTTCAAATGCAACAATGGACGG -3'               |
| RNAi-AP1 $\gamma$ 1-R EcoRI                        | 5'- gggGAATTCTAGGACAGAACAAGGTAGCTTTGTC -3'            |
| RNAi-AP1 $\gamma$ 1-F XbaI                         | 5'- gggTCTAGATTTCAAATGCAACAATGGACGG -3'               |
| RNAi-AP1 $\gamma$ 1-R ClaI                         | 5'- gggATCGATTAGGACAGAACAAGGTAGCTTTGTC -3'            |
| <i>ap1<math>\gamma</math>2</i> genotyping-F        | 5'- TGACAACAATAAGTGCATGCC -3'                         |
| <i>ap1<math>\gamma</math>2</i> genotyping-R        | 5'- AAACAATCATGGCCATTGAAG -3'                         |
| GFP-INT1-Forward                                   | 5'- gggACTAGTATGACATTGACGATCCCAAACG-3'                |
| GFP-INT1-Reverse                                   | 5'- gggGGTACCAGATTGAGATCCCTGCTCGAGTAACC-3'            |
